# Supplementary material for: The Health-e Babies App for antenatal education: Feasibility for socially disadvantaged women
Source: PubMed Central journal article supplement (PMC5955503; doi:10.1371/journal.pone.0194337), 2018-05-16
Supplement: pone.0194337.s001.pdf [file pone.0194337.s001.pdf]

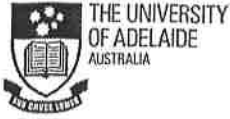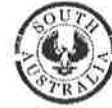

**HEALTH-e BABY – INITIAL QUESTIONNAIRE**

**ID CODE:**

**DATE:** .....

1. How old are you? .....
2. What is your due date for this pregnancy? .....
3. What is your cultural or ethnic background?  
.....
4. Where were you born?  
.....
5. If you were not born in Australia, what year did you come to Australia?  
.....
6. What is the highest level of schooling that you have completed or are currently enrolled in?  
.....
7. Are you?
  - Unemployed
  - Employed
  - Student
  - Home Duties
8. Which of the following best describes you:
  - Never Married
  - Widowed
  - Divorced
  - Separated
  - De Facto/Married
9. Do you have a Government Health Care Card?
  - Yes
  - No

10. What sort of phone plan do you have?

- Pre-paid
- Monthly Plan
- Monthly Capped Plan (limited calls and internet use)

11. Since you became pregnant, have you looked for any information about pregnancy and childbirth on the Internet?

- Yes
- No

12. If Yes, which websites:

- [www.cyh.gov.au](http://www.cyh.gov.au)
- [www.pregnancy.com.au](http://www.pregnancy.com.au)
- [www.health.sa.gov.au](http://www.health.sa.gov.au)
- Others: please state which websites:

---



---

13. Since you became pregnant, have you looked for any information about pregnancy and childbirth from a Phone App?

- Yes
- No

14. If Yes, do you currently use any Pregnancy Apps on your phone?

- Yes
- No

15. Would you like reminders sent to you about your antenatal appointment times/dates by text messages via a Phone App?

- Yes
- No
- Maybe

16. How **confident** are you in knowing where to seek help in your pregnancy if you needed to? Please circle your choice on the scale.

Not at all Confident Very Confident

0                      1                      2                      3                      4                      5                      6

---

## GAD-7 Anxiety

| Over the <u>last two weeks</u> , how often have you been bothered by the following problems? | Not at all | Several days | More than half the days | Nearly every day |
|----------------------------------------------------------------------------------------------|------------|--------------|-------------------------|------------------|
| 1. Feeling nervous, anxious, or on edge                                                      | 0          | 1            | 2                       | 3                |
| 2. Not being able to sleep or control worrying                                               | 0          | 1            | 2                       | 3                |
| 3. Worrying too much about different things                                                  | 0          | 1            | 2                       | 3                |
| 4. Trouble relaxing                                                                          | 0          | 1            | 2                       | 3                |
| 5. Being so restless that it is hard to sit still                                            | 0          | 1            | 2                       | 3                |
| 6. Becoming easily annoyed or irritable                                                      | 0          | 1            | 2                       | 3                |
| 7. Feeling afraid, as if something awful might happen                                        | 0          | 1            | 2                       | 3                |

Column totals    \_\_\_\_\_ + \_\_\_\_\_ + \_\_\_\_\_ + \_\_\_\_\_ =

Total score    \_\_\_\_\_

If you checked any problems, how difficult have they made it for you to do your work, take care of things at home, or get along with other people?

Not difficult at all

Somewhat difficult

Very difficult

Extremely difficult

Source: Primary Care Evaluation of Mental Disorders Patient Health Questionnaire (PRIME-MD-PHQ). The PHQ was developed by Drs. Robert L. Spitzer, Janet B.W. Williams, Kurt Kroenke, and colleagues. For research information, contact Dr. Spitzer at [ris8@columbia.edu](mailto:ris8@columbia.edu). PRIME-MD® is a trademark of Pfizer Inc. Copyright© 1999 Pfizer Inc. All rights reserved. Reproduced with permission

**STATE TRAIT ANXIETY INVENTORY  
QUESTIONNAIRE**

| <b>Question</b>   | <b>Please mark the appropriate number on the scale</b> |               |                 |                |
|-------------------|--------------------------------------------------------|---------------|-----------------|----------------|
| 1. I feel calm    | Not at all<br>1                                        | Somewhat<br>2 | Moderately<br>3 | Very Much<br>4 |
| 2. I am tense     | Not at all<br>1                                        | Somewhat<br>2 | Moderately<br>3 | Very Much<br>4 |
| 3. I feel upset   | Not at all<br>1                                        | Somewhat<br>2 | Moderately<br>3 | Very Much<br>4 |
| 4. I am relaxed   | Not at all<br>1                                        | Somewhat<br>2 | Moderately<br>3 | Very Much<br>4 |
| 5. I feel content | Not at all<br>1                                        | Somewhat<br>2 | Moderately<br>3 | Very Much<br>4 |
| 6. I am worried   | Not at all<br>1                                        | Somewhat<br>2 | Moderately<br>3 | Very Much<br>4 |

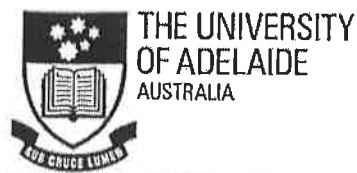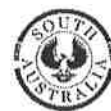

**HEALTH-e BABY STUDY**  
**Maternal Antenatal Attachment Score**  
**(MAAS)**

**ID CODE:**

Please tick the box the appropriate box.

1. Over the past two weeks I have thought about, or been preoccupied with the baby inside me
  - Almost all the time
  - Very frequently
  - Frequently
  - Occasionally
  - Not at all
  
2. Over the past two weeks, when I have spoken about or thought about the baby inside me, I got emotional feelings which were:
  - Very weak or non-existent
  - Fairly Weak
  - In between strong and weak
  - Fairly strong
  - Very strong
  
3. Over the past two weeks my feelings about the baby inside me have been:
  - Very positive
  - Mainly positive
  - Mixed positive and negative
  - Mainly negative
  - Very negative
  
4. Over the past two weeks I have had the desire to read about or get information about the developing baby
  - Very weak or non-existent
  - Fairly weak
  - Neither strong nor weak
  - Moderately strong
  - Very Strong
  
5. Over the past two weeks I have been trying to picture in my mind what the developing baby actually looks like in my womb:
  - Almost all the time
  - Very frequently
  - Frequently
  - Occasionally
  - Not at all

6. Over the past two weeks I think of the developing baby mostly as:
- A real little person with special characteristics
  - A baby like any other baby
  - A human being
  - A living thing
  - A thing not yet really alive
7. Over the past two weeks I have felt that the baby inside me is dependent on me for it's wellbeing:
- Totally
  - A great deal
  - Moderately
  - Slightly
  - Not at all
8. Over the past two weeks I have found myself talking to my baby when I am alone:
- Not at all
  - Occasionally
  - Frequently
  - Very frequently
  - Almost all the time I am alone
9. Over the past two weeks I think about ( or talk to) my baby inside me, my thoughts:
- Are always tender and loving
  - Are mostly tender and loving
  - Are a mixture of both tenderness and irritation
  - Contain a fair bit of irritation
  - Contain a lot of irritation
10. The picture in my mind of what the baby at this stage actually looks like inside of the womb is:
- Very clear
  - Fairly clear
  - Fairly vague
  - Very vague
  - I have no idea at all
11. Over the past two weeks when I think about the baby inside me I get feelings which are:
- Very sad
  - Moderately sad
  - A mixture of happiness and sadness
  - Moderately happy
  - Very happy

12. Some pregnant women sometimes get so irritated by the baby inside them that they feel like they want to hurt or punish it:
- I couldn't imagine I would ever feel like this
  - I could imagine I might sometimes feel like this, but I never actually have
  - I have felt like this once or twice myself
  - I have occasionally felt like this myself
  - I have often felt like this myself
13. Over the past two weeks I have felt:
- Very emotionally distant from my baby
  - Moderately emotionally distant from my baby
  - Not particularly emotionally close to my baby
  - Moderately close emotionally to my baby
  - Very emotionally close to my baby
14. Over the past two weeks I have taken care with what I eat to make sure the baby gets a good diet:
- Not at all
  - Once or twice when I ate
  - Occasionally when I ate
  - Quite often when I ate
  - Every time I ate
15. When I first see my baby after the birth I expect I will feel:
- Intense affection
  - Mostly affection
  - Dislike about one or two aspects of the baby
  - Dislike about quite a few aspects of the baby
  - Mostly dislike
16. When my baby is born I would like to hold the baby:
- Immediately
  - After it has been wrapped in a blanket
  - After it has been washed
  - After a few hours for things to settle down
  - The next day
17. Over the past two weeks I have had dreams about the pregnancy or baby:
- Not at all
  - Occasionally
  - Frequently
  - Very frequently
  - Almost every night

18. Over the past two weeks I have found myself feeling, or rubbing with my hand the outside of my stomach where the baby is:

- A lot of times each day
- At least once a day
- Occasionally
- Once only
- Not at all

19. If the pregnancy was lost at this time (due to miscarriage or accidental event) without any pain or injury to myself, I expect I would feel:

- Very pleased
- Moderately pleased
- Neutral (Neither sad, nor pleased or Mixed feelings)
- Moderately sad
- Very sad

**THANK YOU FOR COMPLETING THIS QUESTIONNAIRE**

Copyright JT Condon (Dept of Psychiatry, Flinders Medical Centre, South Australia)



### Parenting Sense of Competence scale

This survey is to help us understand how you feel about being a parent. Whilst we know you are still pregnant and may not be a parent yet, please think about how you feel about this baby and how you feel about being a mother.

| Question                                                                                                                                        | Please mark the appropriate number on the scale |   |   |   |   |                           |
|-------------------------------------------------------------------------------------------------------------------------------------------------|-------------------------------------------------|---|---|---|---|---------------------------|
| 1. The problems of taking care of a child are easy to solve once you know how your actions affect your child, an understanding I have acquired. | Strongly<br>agree<br>1                          | 2 | 3 | 4 | 5 | Strongly<br>disagree<br>6 |
| 2. Even though being a parent could be rewarding, I am frustrated now while my child is at his/her present age.                                 | Strongly<br>agree<br>1                          | 2 | 3 | 4 | 5 | Strongly<br>disagree<br>6 |
| 3. I go to bed the same way I wake up in the morning, feeling I have not accomplished a whole lot.                                              | Strongly<br>agree<br>1                          | 2 | 3 | 4 | 5 | Strongly<br>disagree<br>6 |
| 4. I do not know why it is, but sometimes when I'm supposed to be in control, I feel more like the one being manipulated.                       | Strongly<br>agree<br>1                          | 2 | 3 | 4 | 5 | Strongly<br>disagree<br>6 |
| 5. My mother/father was better prepared to be a good mother than I am.                                                                          | Strongly<br>agree<br>1                          | 2 | 3 | 4 | 5 | Strongly<br>disagree<br>6 |
| 6. I would make a fine model for a new mother to follow in order to learn what she/he would need to know in order to be a good parent.          | Strongly<br>agree<br>1                          | 2 | 3 | 4 | 5 | Strongly<br>disagree<br>6 |
| 7. Being a parent is manageable, and any problems are easily solved.                                                                            | Strongly<br>agree<br>1                          | 2 | 3 | 4 | 5 | Strongly<br>disagree<br>6 |
| 8. A difficult problem in being a parent is not knowing whether you're doing a good job or a bad one.                                           | Strongly<br>agree<br>1                          | 2 | 3 | 4 | 5 | Strongly<br>disagree<br>6 |
| 9. Sometimes I feel like I'm not getting anything done.                                                                                         | Strongly<br>agree<br>1                          | 2 | 3 | 4 | 5 | Strongly<br>disagree<br>6 |
| 10. I meet my own personal expectations for expertise in caring for my child.                                                                   | Strongly<br>agree<br>1                          | 2 | 3 | 4 | 5 | Strongly<br>disagree<br>6 |
| 11. If anyone can find the answer to what is troubling my child, I am the one.                                                                  | Strongly<br>agree<br>1                          | 2 | 3 | 4 | 5 | Strongly<br>disagree<br>6 |
| 12. My talents and interests are in other areas, not in being a parent.                                                                         | Strongly<br>agree<br>1                          | 2 | 3 | 4 | 5 | Strongly<br>disagree<br>6 |
| 13. Considering how long I've been a mother, I feel thoroughly familiar with this role.                                                         | Strongly<br>agree<br>1                          | 2 | 3 | 4 | 5 | Strongly<br>disagree<br>6 |

|                                                                                                                   |                |   |   |   |   |                   |
|-------------------------------------------------------------------------------------------------------------------|----------------|---|---|---|---|-------------------|
| 14. If being a mother of a child were only more interesting, I would be motivated to do a better job as a parent. | Strongly agree |   |   |   |   | Strongly disagree |
|                                                                                                                   | 1              | 2 | 3 | 4 | 5 | 6                 |
| 15. I honestly believe I have all the skills necessary to be a good mother to my child.                           | Strongly agree |   |   |   |   | Strongly disagree |
|                                                                                                                   | 1              | 2 | 3 | 4 | 5 | 6                 |
| 16. Being a parent makes me tense and anxious.                                                                    | Strongly agree |   |   |   |   | Strongly disagree |
|                                                                                                                   | 1              | 2 | 3 | 4 | 5 | 6                 |
| 17. Being a good mother is a reward in itself.                                                                    | Strongly agree |   |   |   |   | Strongly disagree |
|                                                                                                                   | 1              | 2 | 3 | 4 | 5 | 6                 |

Thank you for completing this survey.
