# Supplementary material for: The Health-e Babies App for antenatal education: Feasibility for socially disadvantaged women
Source: PubMed Central journal article supplement (PMC5955503; doi:10.1371/journal.pone.0194337), 2018-05-16
Supplement: pone.0194337.s004.pdf [file pone.0194337.s004.pdf]

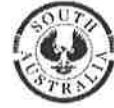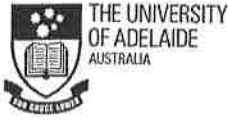

**HEALTH-e BABY – SOCIAL MEDIA**  
**QUESTIONNAIRE / INTERVIEW QUESTIONS**

**ID CODE:**

**DATE:**

1. How often did you look at the Health-e Baby phone app provided to you as part of this study?

Please tick the most appropriate box.

- More than once a day
- At least once a day
- At least once a week
- At least once a fortnight
- At least once a month
- Less than once a month
- Only once when it was installed on my phone

**The Appearance of the App**

2. Did the Health-e Baby app use appropriate **colours**?

Please circle your choice on the scale below.

|                                   |          |          |          |           |          |          |  |                |
|-----------------------------------|----------|----------|----------|-----------|----------|----------|--|----------------|
| <b>Not at all<br/>appropriate</b> |          |          |          | <b>OK</b> |          |          |  | <b>Perfect</b> |
| <b>1</b>                          | <b>2</b> | <b>3</b> | <b>4</b> | <b>5</b>  | <b>6</b> | <b>7</b> |  |                |

3. Did the Health-e Baby app use appropriate **icons**?

Please circle your choice on the scale below

|                                   |          |          |          |           |          |          |  |                |
|-----------------------------------|----------|----------|----------|-----------|----------|----------|--|----------------|
| <b>Not at all<br/>appropriate</b> |          |          |          | <b>OK</b> |          |          |  | <b>Perfect</b> |
| <b>1</b>                          | <b>2</b> | <b>3</b> | <b>4</b> | <b>5</b>  | <b>6</b> | <b>7</b> |  |                |

4. Did the Health-e Baby app use appropriate **pictures**?

Please circle your choice on the scale below

|                                   |          |          |          |           |          |          |  |                |
|-----------------------------------|----------|----------|----------|-----------|----------|----------|--|----------------|
| <b>Not at all<br/>appropriate</b> |          |          |          | <b>OK</b> |          |          |  | <b>Perfect</b> |
| <b>1</b>                          | <b>2</b> | <b>3</b> | <b>4</b> | <b>5</b>  | <b>6</b> | <b>7</b> |  |                |

5. Did the Health-e Baby app use appropriate sound content?

Please circle your choice on the scale below

|                    |          |          |           |          |          |                |
|--------------------|----------|----------|-----------|----------|----------|----------------|
| <b>Not at all</b>  |          |          | <b>OK</b> |          |          | <b>Perfect</b> |
| <b>Appropriate</b> |          |          |           |          |          |                |
| <b>1</b>           | <b>2</b> | <b>3</b> | <b>4</b>  | <b>5</b> | <b>6</b> | <b>7</b>       |

6. How easy or hard was it to use the Health-e Baby app functions?

Please circle your choice on the scale below.

|                                       |          |          |                                   |          |          |                                      |
|---------------------------------------|----------|----------|-----------------------------------|----------|----------|--------------------------------------|
| <b>Impossible to use any features</b> |          |          | <b>Variable / some difficulty</b> |          |          | <b>Very easy to use all features</b> |
| <b>1</b>                              | <b>2</b> | <b>3</b> | <b>4</b>                          | <b>5</b> | <b>6</b> | <b>7</b>                             |

7. How easy or hard was it to find information you needed on the Health-e Baby app?

Please circle your choice on the scale below.

|                                                     |          |          |                                 |          |          |                                                       |
|-----------------------------------------------------|----------|----------|---------------------------------|----------|----------|-------------------------------------------------------|
| <b>Impossible to find any information I wanted.</b> |          |          | <b>Variable/Some difficulty</b> |          |          | <b>Very easy to find all the information I wanted</b> |
| <b>1</b>                                            | <b>2</b> | <b>3</b> | <b>4</b>                        | <b>5</b> | <b>6</b> | <b>7</b>                                              |

8. How easy or hard was it to understand the words and phrases used on the Health-e Baby app?

Please circle your choice on the scale below.

|                                |          |          |                        |          |          |                       |
|--------------------------------|----------|----------|------------------------|----------|----------|-----------------------|
| <b>Couldn't understand Any</b> |          |          | <b>Understood Some</b> |          |          | <b>Understood All</b> |
| <b>1</b>                       | <b>2</b> | <b>3</b> | <b>4</b>               | <b>5</b> | <b>6</b> | <b>7</b>              |

9. How useful was the information you received from the Health-e Baby app?

Please circle your choice on the scale below.

|                          |          |          |                        |          |          |                    |
|--------------------------|----------|----------|------------------------|----------|----------|--------------------|
| <b>Not at all Useful</b> |          |          | <b>Somewhat Useful</b> |          |          | <b>Very Useful</b> |
| <b>1</b>                 | <b>2</b> | <b>3</b> | <b>4</b>               | <b>5</b> | <b>6</b> | <b>7</b>           |

10. Please complete the following sentence:

The most useful information on the Health-e Baby app was \_\_\_\_\_, because

\_\_\_\_\_.

11. Was there any information **NOT** included on the Health-e Baby app that would have been helpful? Please list below:

---

---

---

**If you would like to participate in a Focus Group** to further discuss your opinion of the Health-e Baby app, please leave your name and phone number for Julia (Research Midwife) to call you.

**Name:** ..... **Phone Number:**.....

**Thank you for your participation in the Health-e Baby Study**

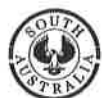

Government  
of South Australia

SA Health

## Edinburgh Postnatal Depression Scale

Patient Identification

UR No: \_\_\_\_\_

Surname: \_\_\_\_\_

Given Names: \_\_\_\_\_

D.O.B. \_\_\_\_\_ Sex \_\_\_\_\_

As you are pregnant, or have recently had a baby, we would like to know how you are feeling now. Please UNDERLINE the answer ~~which comes~~ closest to how you have felt IN THE PAST WEEK.

Here is an example, already ~~completed~~.

I have felt happy:

Today's date \_\_\_\_\_

Yes, all the time

Yes, most of the time

No, not very often

No, not at all

This would mean: 'I have felt happy most of the time' during the past week. Please complete the other questions in the same way.

### IN THE PAST 7 DAYS

**1. I have been able to laugh and see the funny side of things:**

As much as I always could

Not quite so much now

Definitely not so much now

Not at all

**2. I have looked forward with enjoyment to things:**

As much as I ever did

Rather less than I used to

Definitely less than I used to

Hardly at all

**3. I have blamed my self unnecessarily when things went wrong:**

Yes, most of the time

Yes, some of the time

Not very often

No, never

**4. I have felt anxious or worried for no very good reason:**

No, not at all

Hardly ever

Yes, sometimes

Yes, very often

**5. I have felt scared or panicky for no very good reason:**

Yes, quite a lot

Yes, sometimes

No, not much

No, not at all

**6. Things have been getting on top of me:**

Yes, most of the time I haven't been able to cope at all

Yes, sometimes I haven't been coping as well as usual

No, most of the time I have coped quite well

No, I have been coping as well as ever

**7. I have been so unhappy that I have had difficulty sleeping:**

Yes, most of the time

Yes, sometimes

Not very often

No, not at all

**8. I have felt sad or miserable:**

Yes, most of the time

Yes, quite often

Not very often

No, not at all

**9. I have been so unhappy that I have been crying:**

Yes, most of the time

Yes, quite often

Only occasionally

No, never

**10. The thought of harming myself has occurred to me:**

Yes, quite often

Sometimes

Hardly ever

Never

Would you be happy to be contacted by a health professional during your pregnancy for support and information?

Yes  No

Do you consent to these results being forwarded to your GP?

Yes  No

## GAD-7 Anxiety

| Over the <u>last two weeks</u> , how often have you been bothered by the following problems? | Not at all | Several days | More than half the days | Nearly every day |
|----------------------------------------------------------------------------------------------|------------|--------------|-------------------------|------------------|
| 1. Feeling nervous, anxious, or on edge                                                      | 0          | 1            | 2                       | 3                |
| 2. Not being able to sleep or control worrying                                               | 0          | 1            | 2                       | 3                |
| 3. Worrying too much about different things                                                  | 0          | 1            | 2                       | 3                |
| 4. Trouble relaxing                                                                          | 0          | 1            | 2                       | 3                |
| 5. Being so restless that it is hard to sit still                                            | 0          | 1            | 2                       | 3                |
| 6. Becoming easily annoyed or irritable                                                      | 0          | 1            | 2                       | 3                |
| 7. Feeling afraid, as if something awful might happen                                        | 0          | 1            | 2                       | 3                |

Column totals           +        +        +        =  
*Total score*          

|                                                                                                                                                    |                          |                          |                          |
|----------------------------------------------------------------------------------------------------------------------------------------------------|--------------------------|--------------------------|--------------------------|
| If you checked any problems, how difficult have they made it for you to do your work, take care of things at home, or get along with other people? |                          |                          |                          |
| Not difficult at all                                                                                                                               | Somewhat difficult       | Very difficult           | Extremely difficult      |
| <input type="checkbox"/>                                                                                                                           | <input type="checkbox"/> | <input type="checkbox"/> | <input type="checkbox"/> |

Source: Primary Care Evaluation of Mental Disorders Patient Health Questionnaire (PRIME-MD-PHQ). The PHQ was developed by Drs. Robert L. Spitzer, Janet B.W. Williams, Kurt Kroenke, and colleagues. For research information, contact Dr. Spitzer at [ris8@columbia.edu](mailto:ris8@columbia.edu). PRIME-MD® is a trademark of Pfizer Inc. Copyright© 1999 Pfizer Inc. All rights reserved. Reproduced with permission

**STATE TRAIT ANXIETY INVENTORY  
QUESTIONNAIRE**

| <b>Question</b>   | <b>Please mark the appropriate number on the scale</b> |               |                 |                |
|-------------------|--------------------------------------------------------|---------------|-----------------|----------------|
| 1. I feel calm    | Not at all<br>1                                        | Somewhat<br>2 | Moderately<br>3 | Very Much<br>4 |
| 2. I am tense     | Not at all<br>1                                        | Somewhat<br>2 | Moderately<br>3 | Very Much<br>4 |
| 3. I feel upset   | Not at all<br>1                                        | Somewhat<br>2 | Moderately<br>3 | Very Much<br>4 |
| 4. I am relaxed   | Not at all<br>1                                        | Somewhat<br>2 | Moderately<br>3 | Very Much<br>4 |
| 5. I feel content | Not at all<br>1                                        | Somewhat<br>2 | Moderately<br>3 | Very Much<br>4 |
| 6. I am worried   | Not at all<br>1                                        | Somewhat<br>2 | Moderately<br>3 | Very Much<br>4 |

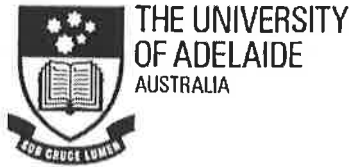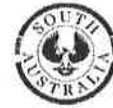

**HEALTH-e BABY STUDY**  
**Maternal Antenatal Attachment Score**  
**(MAAS)**

**ID CODE:**

Please tick the box the appropriate box.

1. Over the past two weeks I have thought about, or been preoccupied with the baby inside me
  - Almost all the time
  - Very frequently
  - Frequently
  - Occasionally
  - Not at all
  
2. Over the past two weeks, when I have spoken about or thought about the baby inside me, I got emotional feelings which were:
  - Very weak or non-existent
  - Fairly Weak
  - In between strong and weak
  - Fairly strong
  - Very strong
  
3. Over the past two weeks my feelings about the baby inside me have been:
  - Very positive
  - Mainly positive
  - Mixed positive and negative
  - Mainly negative
  - Very negative
  
4. Over the past two weeks I have had the desire to read about or get information about the developing baby
  - Very weak or non-existent
  - Fairly weak
  - Neither strong nor weak
  - Moderately strong
  - Very Strong
  
5. Over the past two weeks I have been trying to picture in my mind what the developing baby actually looks like in my womb:
  - Almost all the time
  - Very frequently
  - Frequently
  - Occasionally
  - Not at all

6. Over the past two weeks I think of the developing baby mostly as:
- A real little person with special characteristics
  - A baby like any other baby
  - A human being
  - A living thing
  - A thing not yet really alive
7. Over the past two weeks I have felt that the baby inside me is dependent on me for it's wellbeing:
- Totally
  - A great deal
  - Moderately
  - Slightly
  - Not at all
8. Over the past two weeks I have found myself talking to my baby when I am alone:
- Not at all
  - Occasionally
  - Frequently
  - Very frequently
  - Almost all the time I am alone
9. Over the past two weeks I think about ( or talk to) my baby inside me, my thoughts:
- Are always tender and loving
  - Are mostly tender and loving
  - Are a mixture of both tenderness and irritation
  - Contain a fair bit of irritation
  - Contain a lot of irritation
10. The picture in my mind of what the baby at this stage actually looks like inside of the womb is:
- Very clear
  - Fairly clear
  - Fairly vague
  - Very vague
  - I have no idea at all
11. Over the past two weeks when I think about the baby inside me I get feelings which are:
- Very sad
  - Moderately sad
  - A mixture of happiness and sadness
  - Moderately happy
  - Very happy



12. Some pregnant women sometimes get so irritated by the baby inside them that they feel like they want to hurt or punish it:
- I couldn't imagine I would ever feel like this
  - I could imagine I might sometimes feel like this, but I never actually have
  - I have felt like this once or twice myself
  - I have occasionally felt like this myself
  - I have often felt like this myself
13. Over the past two weeks I have felt:
- Very emotionally distant from my baby
  - Moderately emotionally distant from my baby
  - Not particularly emotionally close to my baby
  - Moderately close emotionally to my baby
  - Very emotionally close to my baby
14. Over the past two weeks I have taken care with what I eat to make sure the baby gets a good diet:
- Not at all
  - Once or twice when I ate
  - Occasionally when I ate
  - Quite often when I ate
  - Every time I ate
15. When I first see my baby after the birth I expect I will feel:
- Intense affection
  - Mostly affection
  - Dislike about one or two aspects of the baby
  - Dislike about quite a few aspects of the baby
  - Mostly dislike
16. When my baby is born I would like to hold the baby:
- Immediately
  - After it has been wrapped in a blanket
  - After it has been washed
  - After a few hours for things to settle down
  - The next day
17. Over the past two weeks I have had dreams about the pregnancy or baby:
- Not at all
  - Occasionally
  - Frequently
  - Very frequently
  - Almost every night

18. Over the past two weeks I have found myself feeling, or rubbing with my hand the outside of my stomach where the baby is:

- A lot of times each day
- At least once a day
- Occasionally
- Once only
- Not at all

19. If the pregnancy was lost at this time (due to miscarriage or accidental event) without any pain or injury to myself, I expect I would feel:

- Very pleased
- Moderately pleased
- Neutral (Neither sad, nor pleased or Mixed feelings)
- Moderately sad
- Very sad

**THANK YOU FOR COMPLETING THIS QUESTIONNAIRE**

Copyright JT Condon (Dept of Psychiatry, Flinders Medical Centre, South Australia)

### Parenting Sense of Competence scale

**This survey is to help us understand how you feel about being a parent. Whilst we know you are still pregnant and may not be a parent yet, please think about how you feel about this baby and how you feel about being a mother.**

| Question                                                                                                                                        | Please mark the appropriate number on the scale |   |   |   |   |                           |
|-------------------------------------------------------------------------------------------------------------------------------------------------|-------------------------------------------------|---|---|---|---|---------------------------|
| 1. The problems of taking care of a child are easy to solve once you know how your actions affect your child, an understanding I have acquired. | Strongly<br>agree<br>1                          | 2 | 3 | 4 | 5 | Strongly<br>disagree<br>6 |
| 2. Even though being a parent could be rewarding, I am frustrated now while my child is at his/her present age.                                 | Strongly<br>agree<br>1                          | 2 | 3 | 4 | 5 | Strongly<br>disagree<br>6 |
| 3. I go to bed the same way I wake up in the morning, feeling I have not accomplished a whole lot.                                              | Strongly<br>agree<br>1                          | 2 | 3 | 4 | 5 | Strongly<br>disagree<br>6 |
| 4. I do not know why it is, but sometimes when I'm supposed to be in control, I feel more like the one being manipulated.                       | Strongly<br>agree<br>1                          | 2 | 3 | 4 | 5 | Strongly<br>disagree<br>6 |
| 5. My mother/father was better prepared to be a good mother than I am.                                                                          | Strongly<br>agree<br>1                          | 2 | 3 | 4 | 5 | Strongly<br>disagree<br>6 |
| 6. I would make a fine model for a new mother to follow in order to learn what she/he would need to know in order to be a good parent.          | Strongly<br>agree<br>1                          | 2 | 3 | 4 | 5 | Strongly<br>disagree<br>6 |
| 7. Being a parent is manageable, and any problems are easily solved.                                                                            | Strongly<br>agree<br>1                          | 2 | 3 | 4 | 5 | Strongly<br>disagree<br>6 |
| 8. A difficult problem in being a parent is not knowing whether you're doing a good job or a bad one.                                           | Strongly<br>agree<br>1                          | 2 | 3 | 4 | 5 | Strongly<br>disagree<br>6 |
| 9. Sometimes I feel like I'm not getting anything done.                                                                                         | Strongly<br>agree<br>1                          | 2 | 3 | 4 | 5 | Strongly<br>disagree<br>6 |
| 10. I meet my own personal expectations for expertise in caring for my child.                                                                   | Strongly<br>agree<br>1                          | 2 | 3 | 4 | 5 | Strongly<br>disagree<br>6 |
| 11. If anyone can find the answer to what is troubling my child, I am the one.                                                                  | Strongly<br>agree<br>1                          | 2 | 3 | 4 | 5 | Strongly<br>disagree<br>6 |
| 12. My talents and interests are in other areas, not in being a parent.                                                                         | Strongly<br>agree<br>1                          | 2 | 3 | 4 | 5 | Strongly<br>disagree<br>6 |
| 13. Considering how long I've been a mother, I feel thoroughly familiar with this role.                                                         | Strongly<br>agree<br>1                          | 2 | 3 | 4 | 5 | Strongly<br>disagree<br>6 |

|                                                                                                                   |                |   |   |   |   |                   |
|-------------------------------------------------------------------------------------------------------------------|----------------|---|---|---|---|-------------------|
| 14. If being a mother of a child were only more interesting, I would be motivated to do a better job as a parent. | Strongly agree |   |   |   |   | Strongly disagree |
|                                                                                                                   | 1              | 2 | 3 | 4 | 5 | 6                 |
| 15. I honestly believe I have all the skills necessary to be a good mother to my child.                           | Strongly agree |   |   |   |   | Strongly disagree |
|                                                                                                                   | 1              | 2 | 3 | 4 | 5 | 6                 |
| 16. Being a parent makes me tense and anxious.                                                                    | Strongly agree |   |   |   |   | Strongly disagree |
|                                                                                                                   | 1              | 2 | 3 | 4 | 5 | 6                 |
| 17. Being a good mother is a reward in itself.                                                                    | Strongly agree |   |   |   |   | Strongly disagree |
|                                                                                                                   | 1              | 2 | 3 | 4 | 5 | 6                 |

Thank you for completing this survey.
