# Supplementary material for: The Health-e Babies App for antenatal education: Feasibility for socially disadvantaged women
Source: PubMed Central journal article supplement (PMC5955503; doi:10.1371/journal.pone.0194337), 2018-05-16
Supplement: pone.0194337.s005.pdf [file pone.0194337.s005.pdf]

| ID  | AGE | MARITAL   | EDUCATIO    | EMPLOYED  | HCC | PHONEPLA   | INTERNET | WEBSITES   |
|-----|-----|-----------|-------------|-----------|-----|------------|----------|------------|
| 2   | 31  | Married/D | Certificate | Employed  | Yes | Pre-paid   | Yes      | Govt       |
| 3   | 34  | Married/D | Certificate | Employed  | No  | Phone Plan | Yes      | Non-Govt   |
| 9   | 27  | Married/D | Year 11     | Homedutie | No  | Pre-paid   | No       | None       |
| 10  | 38  | Married/D | University  | Employed  | Yes | Phone Plan | Yes      | Non-Govt   |
| 14  | 28  | Married/D | Year 12     | Employed  | No  | Phone Plan | Yes      | Govt       |
| 21  | 41  | Married/D | Certificate | Employed  | Yes | Phone Plan | Yes      | Govt       |
| 24  | 28  | Married/D | Year 12     | Employed  | No  | Phone Plan | Yes      | Non-Govt   |
| 26  | 32  | Married/D | University  | Employed  | No  | Phone Plan | Yes      | Non-Govt   |
| 45  | 34  | Married/D | Year 12     | Employed  | No  | Phone Plan | Yes      | Non-Govt   |
| 55  | 25  | Married/D | Year 11     | Employed  | No  | Phone Plan | Yes      | Govt       |
| 58  | 23  | Married/D | Year 12     | Employed  | No  | Pre-paid   | Yes      | Non-Govt   |
| 62  | 25  | Married/D | Year 11     | Homedutie | No  | Pre-paid   | No       | None       |
| 66  | 26  | Married/D | Year 12     | Employed  | No  | Phone Plan | Yes      | Non-Govt   |
| 70  | 19  | Single    | Year 11     | Employed  | Yes | Pre-paid   | No       | None       |
| 80  | 23  | Married/D | Year 10     | Homedutie | Yes | Phone Plan | Yes      | Govt       |
| 85  | 19  | Married/D | Year 12     | Homedutie | Yes | Phone Plan | Yes      | Govt       |
| 97  | 26  | Married/D | University  | Employed  | No  | Phone Plan | Yes      | Govt       |
| 100 | 25  | Single    | Year 11     | Unemploye | Yes | Phone Plan | Yes      | Govt       |
| 103 | 21  | Married/D | Year 12     | Employed  | No  | Phone Plan | No       | None       |
| 107 | 35  | Married/D | Year 12     | Employed  | No  | Phone Plan | Yes      | Govt       |
| 110 | 34  | Married/D | University  | Homedutie | No  | Monthly ca | Yes      | Non-Govt   |
| 113 | 22  | Married/D | Year 12     | Employed  | No  | Phone Plan | No       | None       |
| 116 | 23  | Married/D | Year 11     | Homedutie | Yes | Pre-paid   | Yes      | Govt       |
| 1   | 22  | Married/D | Certificate | Unemploye | No  | Phone Plan | Yes      | Govt and N |
| 4   | 20  | Single    | Year 10     | Unemploye | Yes | Pre-paid   | Yes      | Govt       |
| 5   | 20  | Single    | Year 10     | Employed  | No  | Pre-paid   | Yes      | Non-Govt   |
| 6   | 27  | Single    | Year 10     | Homedutie | Yes | Phone Plan | Yes      | Govt       |
| 8   | 32  | Married/D | Year 12     | Employed  | No  | Pre-paid   | No       | None       |
| 11  | 30  | Married/D | University  | Homedutie | Yes | Pre-paid   | Yes      | Govt       |
| 15  | 27  | Single    | Year 10     | Homedutie | Yes | Pre-paid   | Yes      | Non-Govt   |
| 16  | 21  | Married/D | Certificate | Student   | Yes | Phone Plan | Yes      | Non-Govt   |
| 17  | 29  | Separated | Year 12     | Employed  | Yes | Phone Plan | No       | None       |
| 18  | 23  | Married/D | University  | Employed  | No  | Phone Plan | Yes      | Govt       |
| 19  | 19  | Married/D | Year 10     | Employed  | No  | Phone Plan | Yes      | Govt       |
| 20  | 24  | Single    | Year 10     | Unemploye | Yes | Pre-paid   | Yes      | Govt       |
| 22  | 32  | Married/D | Year 10     | Employed  | Yes | Pre-paid   | Yes      | Non-Govt   |
| 23  | 23  | Single    | Year 12     | Employed  | No  | Phone Plan | No       | None       |
| 25  | 21  | Married/D | Year 10     | Employed  | No  | Phone Plan | Yes      | Non-Govt   |
| 27  | 22  | Single    | Certificate | Student   | No  | Phone Plan | No       | None       |
| 28  | 26  | Single    | Year 11     | Employed  | Yes | Pre-paid   | Yes      | Non-Govt   |
| 29  | 31  | Married/D | Certificate | Homedutie | No  | Phone Plan | Yes      | Govt       |
| 32  | 25  | Married/D | Year 12     | Unemploye | Yes | Pre-paid   | Yes      | Govt       |
| 33  | 23  | Married/D | Year 12     | Employed  | Yes | Pre-paid   | No       | Govt       |
| 34  | 26  | Married/D | University  | Employed  | No  | Monthly ca | Yes      | None       |
| 36  | 35  | Married/D | Year 11     | Homedutie | No  | Pre-paid   | No       | Govt       |
| 37  | 26  | Married/D | Year 12     | Employed  | No  | Monthly ca | Yes      | None       |
| 38  | 20  | Single    | Year 10     | Employed  | No  | Monthly ca | No       | Govt       |
| 39  | 20  | Married/D | Year 10     | Homedutie | Yes | Pre-paid   | Yes      | Govt       |
| 42  | 26  |           | Year 12     | Employed  | No  | Phone Plan | Yes      | Govt       |

|     |    |                  |             |            |     |              |     |            |
|-----|----|------------------|-------------|------------|-----|--------------|-----|------------|
| 47  | 24 | Married/Divorced | Certificate | Unemployed | Yes | Pre-paid     | No  | Non-Govt   |
| 48  | 21 | Married/Divorced | Year 11     | Homemaker  | Yes | Monthly call | No  | None       |
| 49  | 23 | Married/Divorced | Year 11     | Homemaker  | No  | Phone Plan   | No  | None       |
| 50  | 30 | Married/Divorced | Certificate | Employed   | No  | Phone Plan   | Yes | None       |
| 51  | 22 | Married/Divorced | Year 9      | Employed   | No  | Phone Plan   | Yes | Non-Govt   |
| 52  | 18 | Married/Divorced | Year 10     | Student    | Yes | Pre-paid     | Yes | Non-Govt   |
| 53  | 27 | Single           | Year 10     | Homemaker  | Yes | Pre-paid     | Yes | Govt       |
| 54  | 33 | Married/Divorced | University  | Employed   | No  | Monthly call | Yes | Govt       |
| 57  | 31 | Married/Divorced | Certificate | Employed   | No  | Monthly call | Yes | Non-Govt   |
| 63  | 23 | Married/Divorced | Certificate | Homemaker  | No  | Phone Plan   | Yes | Govt and N |
| 64  | 26 | Single           | Year 9      | Unemployed | Yes | Pre-paid     | No  | Non-Govt   |
| 65  | 27 | Married/Divorced | University  | Homemaker  | No  | Pre-paid     | Yes | None       |
| 67  | 22 | Married/Divorced | Year 12     | Employed   | No  | Phone Plan   | Yes | Non-Govt   |
| 68  | 27 | Married/Divorced | Year 12     | Employed   | No  | Phone Plan   | Yes | Govt and N |
| 69  | 20 | Married/Divorced | University  | Unemployed | Yes | Phone Plan   | Yes | Non-Govt   |
| 72  | 21 | Single           | Year 12     | Employed   | No  | Phone Plan   | Yes | Non-Govt   |
| 74  | 23 | Single           | Year 10     | Homemaker  | Yes | Pre-paid     | Yes | Non-Govt   |
| 75  | 23 | Married/Divorced | University  | Student    | No  | Phone Plan   | No  | Govt       |
| 77  | 28 | Married/Divorced | University  | Homemaker  | No  | Phone Plan   | Yes | Non-Govt   |
| 81  | 24 | Single           | Year 12     | Student    | Yes | Pre-paid     | Yes | Non-Govt   |
| 82  | 32 | Married/Divorced | Certificate | Student    | Yes | Pre-paid     | Yes | Govt and N |
| 83  | 24 | Separated        | Year 11     | Student    | Yes | Pre-paid     | No  | None       |
| 84  | 26 | Single           | Year 11     | Homemaker  | Yes | Pre-paid     | Yes | Govt       |
| 86  | 22 | Married/Divorced | Year 11     | Unemployed | No  | Pre-paid     | Yes | Non-Govt   |
| 87  | 23 | Single           | Certificate | Employed   | No  | Phone Plan   | Yes | Non-Govt   |
| 88  | 29 | Single           | Year 12     | Student    | Yes | Pre-paid     | No  | None       |
| 89  | 23 | Single           | Year 11     | Employed   | No  | Phone Plan   | Yes | Non-Govt   |
| 90  | 26 | Married/Divorced | University  | Employed   | No  | Phone Plan   | Yes | Non-Govt   |
| 91  | 32 | Single           | Certificate | Employed   | Yes | Phone Plan   | Yes | Non-Govt   |
| 92  | 23 | Married/Divorced | Year 10     | Homemaker  | No  | Pre-paid     | No  | None       |
| 93  | 22 | Married/Divorced | Certificate | Student    | Yes | Pre-paid     | Yes | Non-Govt   |
| 94  | 27 | Married/Divorced | Year 10     | Employed   | No  | Phone Plan   | Yes | Govt       |
| 95  | 20 | Single           | Year 11     | Homemaker  | Yes | Pre-paid     | No  | None       |
| 98  | 25 | Married/Divorced | Certificate | Employed   | No  | Phone Plan   | Yes | Govt and N |
| 99  | 18 | Married/Divorced | Year 11     | Unemployed | Yes | Phone Plan   | Yes | Govt       |
| 101 | 27 | Married/Divorced | Year 10     | Homemaker  | Yes | Monthly call | No  | None       |
| 102 | 28 | Married/Divorced | Year 11     | Employed   | No  | Phone Plan   | Yes | Non-Govt   |
| 104 | 25 | Married/Divorced | Year 12     | Employed   | No  | Phone Plan   | Yes | Govt and N |
| 105 | 28 | Single           | Year 12     | Homemaker  | Yes | Monthly call | Yes | Govt       |
| 106 | 32 | Married/Divorced | Certificate | Homemaker  | Yes | Pre-paid     | Yes | Non-Govt   |
| 107 | 35 | Married/Divorced | Year 12     | Employed   | No  | Phone Plan   | Yes | Govt       |
| 108 | 33 | Married/Divorced | Year 10     | Homemaker  | No  | Phone Plan   | Yes | Govt       |
| 109 | 27 | Married/Divorced | Year 12     | Employed   | Yes | Phone Plan   | Yes | Non-Govt   |
| 111 | 29 | Married/Divorced | University  | Employed   | No  | Phone Plan   | Yes | Govt and N |
| 112 | 30 | Married/Divorced | Certificate | Homemaker  | Yes | Pre-paid     | Yes | Non-Govt   |
| 114 | 38 | Married/Divorced | Certificate | Employed   | No  | Monthly call | Yes | Govt       |
| 115 | 36 | Married/Divorced | University  | Employed   | No  | Phone Plan   | Yes | Govt and N |
| 117 | 23 | Married/Divorced | Certificate | Employed   | Yes | Pre-paid     | Yes | Non-Govt   |
| 118 | 26 | Married/Divorced | Year 11     | Unemployed | Yes | Phone Plan   | Yes | Non-Govt   |
| 119 | 30 | Single           | Certificate | Homemaker  | Yes | Phone Plan   | Yes | Non-Govt   |

|     |                     |             |            |     |              |     |          |
|-----|---------------------|-------------|------------|-----|--------------|-----|----------|
| 120 | 28 Married/Divorced | Year 11     | Employed   | Yes | Phone Plan   | Yes | Govt     |
| 125 | 26 Married/Divorced | Certificate | Employed   | No  | Monthly call | Yes | Non-Govt |
| 126 | 29 Married/Divorced | Year 12     | Employed   | No  | Phone Plan   | Yes | Non-Govt |
| 129 | 18 Married/Divorced | Year 11     | Unemployed | Yes | Phone Plan   | No  | None     |
| 130 | 27 Married/Divorced | University  | Employed   | No  | Phone Plan   | Yes | Non-Govt |
| 131 | 17 Married/Divorced | Year 10     | Unemployed | Yes | Phone Plan   | Yes | Non-Govt |
| 132 | 21 Single           | Year 10     | Unemployed | Yes | Pre-paid     | Yes | Non-Govt |
| 133 | 27 Married/Divorced | Year 12     | Employed   | No  | Phone Plan   | Yes | Govt     |
| 134 | 23 Married/Divorced | Certificate | Employed   | Yes | Phone Plan   | Yes | Govt     |
| 135 | 19 Married/Divorced | Year 10     | Employed   | No  | Pre-paid     | Yes | Govt     |
| 136 | 23 Single           | Year 12     | Employed   | No  | Phone Plan   | Yes | Govt     |
| 137 | 27 Married/Divorced | Certificate | Employed   | No  | Phone Plan   | Yes | Non-Govt |
| 138 | 22 Married/Divorced | Year 12     | Employed   | No  | Phone Plan   | Yes | Non-Govt |
| 139 | 24 Married/Divorced | Year 11     | Unemployed | No  | Phone Plan   | Yes | Non-Govt |
| 140 | 21 Married/Divorced | Year 9      | Student    | Yes | Pre-paid     | Yes | Govt     |
| 141 | 29 Married/Divorced | Year 12     | Unemployed | No  | Phone Plan   | Yes | Non-Govt |
| 142 | 21 Married/Divorced | Year 12     | Employed   | No  | Phone Plan   | Yes | Govt     |
| 143 | 28 Married/Divorced | Year 12     | Employed   | No  | Phone Plan   | Yes | Govt     |
| 144 | 41 Married/Divorced | University  | Employed   | No  | Phone Plan   | Yes | Govt     |
| 145 | 25 Married/Divorced | Year 12     | Employed   | No  | Phone Plan   | Yes | Non-Govt |
| 146 | 27 Married/Divorced | Year 12     | Employed   | No  | Phone Plan   | Yes | Govt     |
| 147 | 26 Married/Divorced | Year 12     | Employed   | No  | Phone Plan   | Yes | Non-Govt |
| 148 | 30 Divorced         | Year 10     | Employed   | No  | Monthly call | Yes | Govt     |
| 149 | 21 Married/Divorced | Year 11     | Employed   | No  | Phone Plan   | Yes | Govt     |
| 150 | 27 Married/Divorced | Year 12     | Employed   | No  | Phone Plan   | Yes | Non-Govt |

| APPS | APPSNOW | REMINDER | CONFIDEN | ETHNICITY            | EPDS | GAD7 | STAI | MAAS |
|------|---------|----------|----------|----------------------|------|------|------|------|
| No   | No      | Yes      | 3        | Caucasian /          | 14   | 4    | 11   | 62   |
| No   | No      | Yes      | 6        | Filipino             | 0    | 0    | 6    | 90   |
| Yes  | Yes     | Yes      | 6        | Caucasian /          | 1    | 1    | 6    | 87   |
| Yes  | Yes     | Yes      | 6        | Caucasian l          | 4    | 1    | 10   | 83   |
| Yes  | Yes     | Yes      | 4        | Caucasian /          | 3    | 2    | 8    | 70   |
| No   | No      | Yes      | 3        | Filipino             |      | 11   | 10   | 88   |
| Yes  | Yes     | Yes      | 4        | Caucasian /          | 0    | 0    | 6    | 79   |
| No   | No      | Yes      | 4        | Vietnamesi           | 7    | 5    | 8    | 61   |
| Yes  | Yes     | No       | 6        | Caucasian /          | 6    | 1    | 7    | 84   |
| No   | No      | Yes      | 3        | Caucasian Australian |      | 2    | 12   | 78   |
| No   | No      | Yes      | 3        | Caucasian /          | 3    | 1    | 7    | 87   |
| Yes  | No      | Yes      | 6        | Caucasian /          | 1    | 6    | 6    | 81   |
| Yes  | Yes     | Yes      | 5        | Caucasian /          | 3    | 1    | 6    | 81   |
| Yes  | Yes     | Yes      | 6        | Caucasian /          | 11   | 1    | 8    | 68   |
| No   | No      | Yes      | 6        | Caucasian /          | 0    | 4    | 8    | 64   |
| Yes  | Yes     | Yes      | 5        | Caucasian /          | 0    | 1    | 6    | 84   |
| Yes  | No      | Yes      | 2        | Caucasian /          | 2    | 1    | 7    | 72   |
| Yes  | Yes     | Yes      | 6        | Caucasian /          | 4    | 0    | 7    | 81   |
| Yes  | Yes     | Yes      | 3        | Caucasian /          | 4    | 4    | 9    | 82   |
| Yes  | Yes     | Yes      | 6        | Caucasian l          | 15   | 8    | 12   | 79   |
| No   | No      | Yes      | 5        | Indian               | 28   | 12   | 11   | 74   |
| Yes  | No      | Yes      | 5        | Caucasian /          | 0    | 0    | 10   | 69   |
| Yes  | Yes     | Yes      | 5        | Caucasian Australian |      | 3    | 14   | 79   |
| No   | No      | Yes      | 5        | Caucasian /          | 3    | 1    | 7    | 72   |
| No   | No      | Yes      | 3        | Indian               | 2    | 0    | 6    | 80   |
| Yes  | Yes     | Yes      | 6        | Caucasian /          | 12   | 10   | 12   | 82   |
| No   | No      | Yes      | 5        | Caucasian /          | 10   | 7    | 12   | 70   |
| No   | No      | Unsure   | 4        | Filipino             | 5    | 0    | 9    | 66   |
| No   | No      | Yes      | 6        | Caucasian Australian |      | 1    | 6    | 80   |
| No   | No      | Yes      | 6        | Caucasian /          | 10   | 7    | 11   | 81   |
| Yes  | Yes     | Yes      | 6        | Caucasian /          | 7    | 1    | 8    | 84   |
| No   | No      | Yes      | 3        | Vietnamesi           | 1    | 0    | 15   | 74   |
| Yes  | Yes     | Yes      | 4        | Caucasian l          | 0    | 2    | 8    | 82   |
| Yes  | Yes     | Yes      | 5        | Caucasian /          | 0    | 2    | 9    | 75   |
| Yes  | Yes     | Yes      | 6        | Caucasian l          | 4    | 8    | 13   | 79   |
| Yes  | Yes     | Yes      | 4        | Caucasian /          | 26   | 21   | 22   | 66   |
| No   | No      | Yes      | 4        | Aboriginal           | 1    | 7    | 7    | 83   |
| No   | No      | Yes      | 4        | Caucasian Australian |      | 0    | 6    | 92   |
| No   | No      | Yes      | 3        | Other                | 0    | 1    | 6    |      |
| No   | No      | Yes      | 6        | Caucasian /          | 3    | 1    | 10   | 82   |
| No   | No      | Yes      | 3        | Caucasian Australian |      | 10   | 18   | 70   |
| No   | No      | Yes      | 5        | Caucasian /          | 10   | 7    | 8    | 81   |
| No   | No      | Yes      | 3        | Caucasian /          | 1    | 5    | 11   | 70   |
| Yes  | Yes     | No       | 5        | Indian               |      | 2    | 14   | 71   |
| Yes  | Yes     | Yes      | 6        | Caucasian /          | 2    | 0    | 6    | 84   |
| Yes  | Yes     | Yes      | 3        | Caucasian /          | 3    | 2    | 7    | 84   |
| Yes  | Yes     | Yes      | 5        | Caucasian /          | 11   | 11   | 15   | 67   |
| No   | No      | Unsure   | 5        | Caucasian /          | 15   | 14   | 16   | 84   |
| No   | No      | Yes      | 5        | Caucasian /          | 2    | 5    | 14   | 66   |

|     |     |        |                        |    |    |    |    |
|-----|-----|--------|------------------------|----|----|----|----|
| No  | No  | Yes    | 2 Other                | 18 | 1  | 7  | 72 |
| No  | No  | Unsure | 5 Caucasian Australian |    | 0  | 9  | 68 |
| No  | No  | Yes    | 4 Caucasian /          | 2  | 1  | 10 | 69 |
| Yes | Yes | Yes    | 3 Caucasian /          | 5  | 2  | 12 | 83 |
| No  | No  | Yes    | 4 Caucasian /          | 14 | 10 | 18 | 77 |
| Yes | Yes | Yes    | 4 Caucasian l          | 7  | 8  | 14 | 84 |
| No  | No  | Yes    | 3 Caucasian UK         |    | 7  | 17 | 78 |
| Yes | Yes | Yes    | 4 Other                | 8  | 4  | 11 | 80 |
| No  | No  | Yes    | 6 Other                | 0  | 0  | 6  | 88 |
| No  | No  | Yes    | 3 Caucasian /          | 4  | 3  | 9  | 76 |
| No  | No  | Yes    | 3 Caucasian /          | 9  | 8  | 15 | 78 |
| No  | No  | Yes    | 4 Other                | 7  | 2  | 12 | 67 |
| Yes | Yes | Yes    | 3 Caucasian /          | 5  | 4  | 9  | 82 |
| Yes | Yes | Yes    | 6 Caucasian /          | 3  | 0  | 8  | 78 |
| Yes | Yes | Yes    | 6 Caucasian /          | 3  | 0  | 7  | 67 |
| Yes | Yes | Yes    | 4 Caucasian /          | 4  | 8  | 15 | 68 |
| No  | No  | Yes    | 6 Caucasian /          | 7  | 11 | 14 | 74 |
| No  | No  | Yes    | 3 Caucasian /          | 5  | 4  | 14 | 58 |
| No  | No  | Yes    | 4 Other                | 3  | 1  | 8  | 89 |
| Yes | No  | Yes    | 5 Other                | 14 | 15 | 10 | 91 |
| Yes | Yes | Yes    | 2 Other                | 8  | 6  | 13 | 85 |
| No  | No  | Yes    | 4 Caucasian /          | 9  | 6  | 11 | 74 |
| Yes | Yes | Yes    | 6 Caucasian /          | 9  | 5  | 13 | 72 |
| No  | No  | Yes    | 1 Caucasian /          | 0  | 4  | 15 | 75 |
| Yes | Yes | Yes    | 4 Caucasian /          | 2  | 2  | 11 | 75 |
| No  | No  | Yes    | 4 Caucasian /          | 7  | 2  | 11 | 83 |
| No  | No  | Unsure | 5 Caucasian /          | 2  | 4  | 13 | 72 |
| No  | No  | Yes    | 5 Filipino             | 5  | 0  | 13 | 85 |
| Yes | Yes | Yes    | 5 Caucasian /          | 6  | 5  | 12 | 71 |
| Yes | No  | Yes    | 6 Caucasian /          | 7  | 3  | 9  | 11 |
| No  | No  | Yes    | 3 Caucasian /          | 6  | 3  | 12 | 76 |
| Yes | Yes | Yes    | 4 Caucasian /          | 12 | 7  | 15 | 77 |
| Yes | Yes | No     | 3 Caucasian /          | 1  | 0  | 9  | 72 |
| Yes | Yes | Yes    | 6 Caucasian /          | 2  | 0  | 9  | 78 |
| Yes | Yes | Yes    | 5 Caucasian /          | 0  | 0  | 15 | 78 |
| Yes | Yes | Yes    | 6 Caucasian /          | 7  | 4  | 9  | 75 |
| No  | No  | Yes    | 6 Caucasian /          | 8  | 9  | 11 | 86 |
| Yes | Yes | Yes    | 6 Caucasian /          | 7  | 7  | 15 | 87 |
| Yes | Yes | Yes    | 6 Caucasian /          | 4  | 1  | 7  | 86 |
| Yes | Yes | Yes    | 6 Caucasian /          | 7  | 7  | 15 | 80 |
| Yes | Yes | Yes    | 6 Caucasian l          | 15 | 8  | 12 | 75 |
| No  | No  | Yes    | 5 Caucasian /          | 6  | 5  | 10 | 79 |
| No  | No  | Yes    | 6 Caucasian Australian |    | 3  | 11 | 81 |
| Yes | Yes | Yes    | 4 Indian               | 3  | 1  | 11 | 73 |
| No  | No  | No     | 4 Caucasian /          | 11 | 6  | 14 | 76 |
| Yes | Yes | Yes    | 5 Caucasian /          | 5  | 5  | 6  | 74 |
| No  | No  | Unsure | 5 Caucasian UK         |    | 2  | 10 | 70 |
| Yes | Yes | Yes    | 6 Caucasian Australian |    | 7  | 13 | 76 |
| Yes | Yes | Yes    | 6 Caucasian Australian |    | 5  | 12 | 88 |
| Yes | Yes | Yes    | 6 Caucasian Australian |    | 15 | 16 | 79 |

|     |     |     |                        |    |    |    |    |
|-----|-----|-----|------------------------|----|----|----|----|
| Yes | Yes | Yes | 6 Caucasian Australian |    |    |    | 75 |
| No  | No  | Yes | 4 Caucasian /          | 5  | 4  | 10 | 67 |
| Yes | Yes | Yes | 4 Other                | 9  | 3  | 13 | 82 |
| No  | No  | Yes | 3 Caucasian Australian |    | 5  | 13 | 39 |
| Yes | Yes | Yes | 4 Caucasian /          | 2  | 3  | 10 | 51 |
| No  | No  | Yes | 4 Caucasian /          | 26 | 13 | 16 |    |
| Yes | Yes | No  | 4 Caucasian Australian |    | 1  | 9  | 83 |
| Yes | No  | Yes | 6 Caucasian /          | 11 | 6  | 11 | 68 |
| Yes | Yes | Yes | 4 Caucasian Australian |    | 16 | 19 | 81 |
| Yes | Yes | Yes | 5 Caucasian /          | 9  | 10 | 10 | 61 |
| No  | No  | Yes | 3 Caucasian /          | 16 | 11 | 16 | 89 |
| Yes | Yes | Yes | 6 Caucasian /          | 6  | 2  | 14 | 89 |
| Yes | No  | Yes | 6 Caucasian /          | 1  | 0  | 8  | 71 |
| Yes | Yes | Yes | 6 Caucasian Australian |    | 6  | 13 | 84 |
| Yes | Yes | Yes | 3 Caucasian /          | 8  | 5  | 8  | 74 |
| Yes | Yes | Yes | 6 Caucasian /          | 0  | 0  | 6  | 90 |
| Yes | Yes | Yes | 5 Caucasian /          | 0  | 0  | 6  | 75 |
| Yes | Yes | Yes | 6 Caucasian Australian |    | 1  | 7  | 77 |
| No  | No  | Yes | 6 Caucasian /          | 6  | 6  | 13 | 71 |
| No  | No  | Yes | 3 Caucasian /          | 10 | 7  | 9  | 72 |
| Yes | Yes | Yes | 4 Caucasian /          | 8  | 1  | 8  | 78 |
| Yes | Yes | Yes | 5 Caucasian /          | 6  | 1  | 6  | 92 |
| No  | No  | Yes | 6 Caucasian /          | 8  | 5  | 10 | 90 |
| No  | No  | Yes | 3 Caucasian /          | 8  | 1  | 6  | 73 |
| Yes | Yes | Yes | 3 Caucasian /          | 4  | 4  | 8  | 76 |

| MAAStol | MAASacc | MAASple | MAAScomf | ANRQ | EPDS2 | GAD72 | STAI2 | MAAS2 |
|---------|---------|---------|----------|------|-------|-------|-------|-------|
| 8       | 11      | 27      | 16       | 31   | 7     | 1     | 11    | 90    |
| 14      | 13      | 37      | 25       | 8    | 11    | 7     | 11    | 89    |
| 14      | 14      | 34      | 25       | 7    | 2     | 2     | 6     | 100   |
| 12      | 15      | 34      | 22       | 18   | 1     | 0     | 13    | 78    |
| 12      | 13      | 29      | 18       | 14   |       |       |       |       |
| 13      | 15      | 35      | 25       |      | 11    | 9     | 11    | 84    |
| 12      | 14      | 31      | 22       | 6    | 0     | 0     | 6     | 83    |
| 7       | 12      | 28      | 14       | 23   | 4     | 7     | 9     | 86    |
| 12      | 15      | 34      | 23       |      | 1     | 0     | 8     | 84    |
| 12      | 13      | 31      | 22       |      | 0     | 2     | 11    | 82    |
| 12      | 14      | 36      | 25       | 7    | 3     | 2     | 7     | 81    |
| 13      | 14      | 32      | 22       | 29   | 2     | 1     | 7     | 82    |
| 7       | 15      | 35      | 24       | 9    | 5     | 0     | 8     | 78    |
| 7       | 13      | 31      | 16       | 27   | 2     | 2     | 8     | 75    |
| 9       | 10      | 28      | 16       | 11   | 0     | 2     | 7     | 75    |
| 12      | 14      | 33      | 25       | 6    | 2     | 3     | 9     | 85    |
| 7       | 14      | 31      | 20       | 9    | 0     | 0     | 6     | 85    |
| 12      | 13      | 33      | 23       | 10   | 4     | 0     | 6     | 86    |
| 13      | 14      | 34      | 21       | 8    | 7     | 3     | 7     | 89    |
| 12      | 14      | 33      | 20       | 40   | 5     | 1     | 7     | 78    |
| 7       | 12      | 28      | 20       |      | 28    | 18    | 14    | 81    |
| 7       | 12      | 33      | 19       | 6    | 2     | 2     | 6     | 74    |
| 14      | 14      | 33      | 23       |      | 2     | 0     | 8     | 82    |
| 9       | 14      | 29      | 19       | 18   |       |       |       |       |
| 7       | 15      | 35      | 23       | 11   |       |       |       |       |
| 15      | 14      | 32      | 21       | 19   |       |       |       |       |
| 9       | 14      | 28      | 19       | 28   |       |       |       |       |
| 7       | 13      | 28      | 18       | 8    |       |       |       |       |
| 10      | 14      | 34      | 22       |      |       |       |       |       |
| 11      | 14      | 33      | 23       | 37   |       |       |       |       |
| 13      | 15      | 32      | 24       | 21   |       |       |       |       |
| 11      | 15      | 31      | 17       | 12   |       |       |       |       |
| 14      | 12      | 33      | 23       | 8    |       |       |       |       |
| 12      | 11      | 38      | 24       | 8    |       |       |       |       |
| 10      | 14      | 34      | 21       | 25   |       |       |       |       |
| 11      | 11      | 25      | 19       | 58   |       |       |       |       |
| 15      | 12      | 32      | 24       | 30   |       |       |       |       |
| 15      | 14      | 39      | 25       |      |       |       |       |       |
|         |         |         | 18       | 16   |       |       |       |       |
| 11      | 14      | 34      | 23       | 20   |       |       |       |       |
| 11      | 13      | 27      | 19       |      |       |       |       |       |
| 12      | 13      | 35      | 21       | 27   |       |       |       |       |
| 11      | 14      | 30      | 15       | 12   |       |       |       |       |
| 10      | 12      | 26      | 23       |      |       |       |       |       |
| 10      | 15      | 31      | 20       | 11   |       |       |       |       |
| 15      | 14      | 35      | 20       | 20   |       |       |       |       |
| 10      | 13      | 27      | 17       | 16   |       |       |       |       |
| 10      | 14      | 36      | 24       | 52   |       |       |       |       |
| 9       | 11      | 27      | 19       | 10   |       |       |       |       |

|    |    |    |    |    |
|----|----|----|----|----|
| 9  | 14 | 29 | 19 | 42 |
| 10 | 12 | 29 | 17 |    |
| 9  | 13 | 25 | 17 | 9  |
| 13 | 14 | 32 | 22 | 28 |
| 11 | 14 | 31 | 21 | 33 |
| 11 | 13 | 36 | 24 | 34 |
| 12 | 13 | 30 | 23 |    |
| 11 | 14 | 32 | 23 | 11 |
| 12 | 15 | 36 | 25 | 5  |
| 6  | 13 | 34 | 23 | 25 |
| 11 | 12 | 33 | 22 | 33 |
| 10 | 13 | 30 | 19 | 8  |
| 11 | 14 | 34 | 23 | 13 |
| 10 | 13 | 27 | 18 | 18 |
| 10 | 11 | 28 | 18 | 8  |
| 9  | 11 | 28 | 20 | 9  |
| 14 | 10 | 28 | 23 | 30 |
| 6  | 12 | 26 | 14 | 43 |
| 13 | 14 | 39 | 23 | 14 |
| 13 | 15 | 38 | 25 | 26 |
| 10 | 15 | 35 | 25 | 11 |
| 11 | 13 | 34 | 21 | 15 |
| 9  | 12 | 31 | 20 | 36 |
| 11 | 11 | 32 | 21 | 28 |
| 9  | 13 | 33 | 20 | 10 |
| 13 | 14 | 32 | 24 | 16 |
| 8  | 14 | 31 | 19 | 10 |
| 15 | 14 | 32 | 24 | 8  |
| 9  | 13 | 30 | 19 | 25 |
| 11 | 13 | 32 | 20 | 16 |
| 12 | 11 | 33 | 21 | 16 |
| 9  | 14 | 28 | 21 | 16 |
| 7  | 14 | 35 | 22 | 11 |
| 11 | 14 | 32 | 21 | 6  |
| 14 | 11 | 28 | 21 | 7  |
| 15 | 14 | 36 | 21 | 33 |
| 13 | 14 | 35 | 25 | 29 |
| 12 | 15 | 35 | 24 | 32 |
| 10 | 14 | 32 | 24 | 29 |
| 9  | 14 | 32 | 20 | 27 |
| 12 | 14 | 33 | 20 | 40 |
| 7  | 15 | 35 | 24 | 13 |
| 7  | 13 | 29 | 24 |    |
| 10 | 13 | 31 | 22 | 7  |
| 9  | 13 | 30 | 22 | 40 |
| 9  | 13 | 31 | 17 | 20 |
| 12 | 14 | 29 | 21 |    |
| 14 | 14 | 37 | 23 |    |
| 14 | 12 | 29 | 24 |    |
| 10 | 12 | 31 | 22 |    |

|    |    |    |    |    |
|----|----|----|----|----|
| 19 | 9  | 6  | 11 | 84 |
| 8  |    |    |    |    |
| 17 | 0  | 0  | 7  | 89 |
|    |    |    |    |    |
| 43 | 5  | 2  | 11 | 85 |
| 14 | 11 | 6  | 12 | 86 |
| 48 | 20 | 18 | 21 | 77 |
| 9  |    |    |    |    |
| 6  |    |    |    |    |
|    |    |    |    |    |
| 33 |    |    |    |    |
| 7  |    |    |    |    |
|    |    |    |    |    |
| 47 |    |    |    |    |
| 33 |    |    |    |    |
| 23 |    |    |    |    |
| 6  |    |    |    |    |
| 24 |    |    |    |    |
| 14 | 9  | 4  | 10 | 82 |
| 28 | 7  | 3  | 8  | 83 |

| MAAStol2 | MAASacc2 | MAASple2 | MAAScomf | PSoCS1 | PSoCS2 | COMPLIAN      | APPuse      | Colours |
|----------|----------|----------|----------|--------|--------|---------------|-------------|---------|
| 14       | 14       | 37       | 25       |        |        | 48 Compliant  | At least on | OK      |
| 13       | 15       | 36       | 25       | 34     |        | 24 Compliant  | At least on | 6       |
| 151      | 15       | 35       | 25       | 35     |        | 24 Compliant  | Less than o | Perfect |
| 10       | 14       | 34       | 20       | 27     |        | 25 Compliant  | At least on | OK      |
|          |          |          |          |        |        | Compliant     | At least on | OK      |
| 13       | 14       | 34       | 23       | 45     |        | 54 Compliant  | At least on | 5       |
| 12       | 14       | 34       | 23       | 29     |        | 24 Compliant  | At least on | 6       |
| 15       | 14       | 35       | 22       | 36     |        | 36 Compliant  | At least on | 5       |
| 12       | 15       | 30       | 22       | 39     |        | 31 Compliant  | At least on | 5       |
| 9        | 14       | 35       | 24       | 55     |        | 49 Compliant  | At least on | OK      |
| 15       | 14       | 35       | 22       | 38     |        | 31 Compliant  | At least on | 6       |
| 12       | 14       | 33       | 23       | 23     |        | 28 Compliant  | At least on | Perfect |
| 9        | 13       | 35       | 21       | 31     |        | 37 Compliant  | Less than o | 5       |
| 12       | 14       | 33       | 16       | 35     |        | 30 Compliant  | More than   | 5       |
| 10       | 13       | 31       | 21       | 26     |        | 24 Compliant  | At least on | OK      |
| 13       | 14       | 34       | 24       | 33     |        | 25 Compliant  | At least on | 5       |
| 13       | 15       | 35       | 22       | 41     |        | 28 Compliant  | Less than o | 5       |
| 14       | 14       | 34       | 24       | 22     |        | 22 Compliant  | At least on | 5       |
| 15       | 14       | 35       | 25       | 35     |        | 38 Compliant  | At least on | 6       |
|          |          |          |          | 57     |        | 43 Compliant  | At least on | Perfect |
| 13       | 12       | 34       | 22       | 54     |        | Compliant     | At least on | 5       |
| 8        | 13       | 33       | 20       | 35     |        | 26 Compliant  | At least on | 5       |
| 14       | 14       | 34       | 20       | 53     |        | 41 Compliant  | More than   | 6       |
|          |          |          |          | 35     |        | Non-Compliant |             |         |
|          |          |          |          | 20     |        | Non-Compliant |             |         |
|          |          |          |          | 40     |        | Non-Compliant |             |         |
|          |          |          |          | 43     |        | Non-Compliant |             |         |
|          |          |          |          | 49     |        | Non-Compliant |             |         |
|          |          |          |          | 34     |        | Non-Compliant |             |         |
|          |          |          |          | 23     |        | Non-Compliant |             |         |
|          |          |          |          | 19     |        | Non-Compliant |             |         |
|          |          |          |          | 46     |        | Non-Compliant |             |         |
|          |          |          |          | 30     |        | Non-Compliant |             |         |
|          |          |          |          |        |        | Non-Compliant |             |         |
|          |          |          |          | 37     |        | Non-Compliant |             |         |
|          |          |          |          | 56     |        | Non-Compliant |             |         |
|          |          |          |          | 47     |        | Non-Compliant |             |         |
|          |          |          |          | 36     |        | Non-Compliant |             |         |
|          |          |          |          | 45     |        | Non-Compliant |             |         |
|          |          |          |          | 30     |        | Non-Compliant |             |         |
|          |          |          |          | 61     |        | Non-Compliant |             |         |
|          |          |          |          | 40     |        | Non-Compliant |             |         |
|          |          |          |          | 29     |        | Non-Compliant |             |         |
|          |          |          |          | 50     |        | Non-Compliant |             |         |
|          |          |          |          | 34     |        | Non-Compliant |             |         |
|          |          |          |          | 25     |        | Non-Compliant |             |         |
|          |          |          |          | 42     |        | Non-Compliant |             |         |
|          |          |          |          | 40     |        | Non-Compliant |             |         |
|          |          |          |          | 55     |        | Non-Compliant |             |         |

|    |               |
|----|---------------|
| 35 | Non-Compliant |
| 30 | Non-Compliant |
| 42 | Non-Compliant |
| 45 | Non-Compliant |
| 45 | Non-Compliant |
| 34 | Non-Compliant |
| 30 | Non-Compliant |
| 41 | Non-Compliant |
| 17 | Non-Compliant |
| 25 | Non-Compliant |
| 58 | Non-Compliant |
| 32 | Non-Compliant |
| 39 | Non-Compliant |
| 36 | Non-Compliant |
| 29 | Non-Compliant |
| 49 | Non-Compliant |
| 53 | Non-Compliant |
| 51 | Non-Compliant |
| 52 | Non-Compliant |
| 43 | Non-Compliant |
| 30 | Non-Compliant |
| 36 | Non-Compliant |
| 52 | Non-Compliant |
| 42 | Non-Compliant |
| 41 | Non-Compliant |
| 51 | Non-Compliant |
| 31 | Non-Compliant |
| 37 | Non-Compliant |
| 48 | Non-Compliant |
| 42 | Non-Compliant |
| 48 | Non-Compliant |
| 36 | Non-Compliant |
| 36 | Non-Compliant |
| 34 | Non-Compliant |
|    | Non-Compliant |
| 26 | Non-Compliant |
| 43 | Non-Compliant |
| 33 | Non-Compliant |
| 42 | Non-Compliant |
| 44 | Non-Compliant |
| 57 | Non-Compliant |
| 31 | Non-Compliant |
| 42 | Non-Compliant |
| 59 | Non-Compliant |
| 56 | Non-Compliant |
| 42 | Non-Compliant |
| 47 | Non-Compliant |
| 35 | Non-Compliant |
| 55 | Non-Compliant |
| 42 | Non-Compliant |

|    |                          |    |
|----|--------------------------|----|
|    | Non-Compliant            |    |
| 44 | 43 Compliant At least on | 6  |
|    | Non-Compliant            |    |
| 39 | Non-Compliant            |    |
| 51 | 41 Compliant At least on | 6  |
|    | Non-Compliant            |    |
| 39 | Non-Compliant            |    |
| 39 | 44 Compliant At least on | OK |
| 53 | Non-Compliant            |    |
| 53 | 42 Compliant At least on | OK |
| 39 | 51 Compliant Only once   | 5  |
|    | Non-Compliant            |    |
| 43 | Non-Compliant            |    |
| 37 | Non-Compliant            |    |
| 48 | Non-Compliant            |    |
| 30 | Non-Compliant            |    |
| 42 | Non-Compliant            |    |
| 30 | Non-Compliant            |    |
| 61 | Non-Compliant            |    |
| 36 | Non-Compliant            |    |
| 43 | Non-Compliant            |    |
| 17 | Non-Compliant            |    |
| 22 | Non-Compliant            |    |
| 43 | 44 Compliant At least on | 3  |
| 52 | 45 Compliant At least on | OK |

| Icons   | Pictures  | Sound   | Functions     | Information   | Words        | Usefulness        | CONFIDENCE    | PARITY      |
|---------|-----------|---------|---------------|---------------|--------------|-------------------|---------------|-------------|
| OK      |           | 5 OK    |               | 6             | 6            | 6                 | 6             | Nullipara   |
|         | 6 Perfect |         | 6 Very easy t |               | 5 Understood |                   | 6             | Nullipara   |
| Perfect | Perfect   | Perfect | Very easy t   |               | 5 Understood | Very useful       |               | Multipara   |
|         | 5         | 5       | 5             | 6             | 5            | 6 Somewhat useful |               | Nullipara   |
| OK      | OK        | OK      |               | 5 Some diffic |              | 5                 | 3             | Nullipara   |
|         | 5         | 5       | 5             | 6             | 5            | 5                 | 6             | Nullipara   |
|         | 6         | 6       | Very easy t   |               | 6            | 6                 | 6             | Multipara   |
|         | 5         | 5       | 5             | 5             | 5            | 5                 | 5             | Multipara   |
|         | 5         | 5       | 5             | 6             | 6 Understood |                   | 5             | Multipara   |
|         | 5         | 5 OK    | Very easy t   |               | 5            | 5                 | 5             | Nullipara   |
|         | 6         | 6       | 6 Very easy t | Very easy t   | Understood   | Very useful       |               | Multipara   |
| Perfect | Perfect   | Perfect | Very easy t   |               | 6 Understood |                   | 6             | Multipara   |
| OK      |           | 5 OK    |               | 6             | 5            | 5                 | 5             | Multipara   |
| OK      |           | 5 OK    |               | 6             | 5            | 5                 | 5             | Nullipara   |
| OK      | OK        | OK      |               | 6             | 6            | 6                 | 5             | Multipara   |
|         | 3         | 6       | 2             | 5 Very easy t | Understood   |                   | 5             | Nullipara   |
|         | 5         | 5       | 5             | 5 Some diffic |              | 5 Somewhat useful |               | Nullipara   |
|         | 5         | 6       | 5 Very easy t |               | 6 Understood |                   | 6 Very confic | Multipara   |
|         | 6         | 5       | 6             | 6             | 6 Understood |                   | 5 Very confic | Multipara   |
| OK      | OK        |         | 6             | 6             | 5 Understood | Somewhat          | Very confic   | Nullipara   |
|         | 6         | 6       | 6             | 6 Very easy t | Understood   | Very useful       |               | 6 Multipara |
|         | 6         | 6       | 6 Very easy t | Very easy t   | Understood   | Very useful       | Very confic   | Multipara   |
|         | 6         | 6 OK    |               | 6 Very easy t | Understood   | Very useful       | Very confic   | Multipara   |
|         |           |         |               |               |              |                   |               | Nullipara   |
|         |           |         |               |               |              |                   |               | Multipara   |
|         |           |         |               |               |              |                   |               | Multipara   |
|         |           |         |               |               |              |                   |               | Nullipara   |
|         |           |         |               |               |              |                   |               | Nullipara   |
|         |           |         |               |               |              |                   |               | Multipara   |
|         |           |         |               |               |              |                   |               | Multipara   |
|         |           |         |               |               |              |                   |               | Nullipara   |
|         |           |         |               |               |              |                   |               | Nullipara   |
|         |           |         |               |               |              |                   |               | Multipara   |
|         |           |         |               |               |              |                   |               | Nullipara   |
|         |           |         |               |               |              |                   |               | Nullipara   |
|         |           |         |               |               |              |                   |               | Multipara   |
|         |           |         |               |               |              |                   |               | Nullipara   |
|         |           |         |               |               |              |                   |               | Nullipara   |
|         |           |         |               |               |              |                   |               | Multipara   |
|         |           |         |               |               |              |                   |               | Nullipara   |
|         |           |         |               |               |              |                   |               | Nullipara   |
|         |           |         |               |               |              |                   |               | Multipara   |
|         |           |         |               |               |              |                   |               | Nullipara   |
|         |           |         |               |               |              |                   |               | Nullipara   |
|         |           |         |               |               |              |                   |               | Multipara   |
|         |           |         |               |               |              |                   |               | Nullipara   |
|         |           |         |               |               |              |                   |               | Nullipara   |
|         |           |         |               |               |              |                   |               | Multipara   |
|         |           |         |               |               |              |                   |               | Nullipara   |
|         |           |         |               |               |              |                   |               | Nullipara   |
|         |           |         |               |               |              |                   |               | Multipara   |
|         |           |         |               |               |              |                   |               | Nullipara   |
|         |           |         |               |               |              |                   |               | Nullipara   |
|         |           |         |               |               |              |                   |               | Multipara   |
|         |           |         |               |               |              |                   |               | Nullipara   |
|         |           |         |               |               |              |                   |               | Nullipara   |
|         |           |         |               |               |              |                   |               | Multipara   |
|         |           |         |               |               |              |                   |               | Nullipara   |
|         |           |         |               |               |              |                   |               | Nullipara   |
|         |           |         |               |               |              |                   |               | Multipara   |
|         |           |         |               |               |              |                   |               | Nullipara   |
|         |           |         |               |               |              |                   |               | Nullipara   |
|         |           |         |               |               |              |                   |               | Multipara   |
|         |           |         |               |               |              |                   |               | Nullipara   |
|         |           |         |               |               |              |                   |               | Nullipara   |
|         |           |         |               |               |              |                   |               | Multipara   |
|         |           |         |               |               |              |                   |               | Nullipara   |
|         |           |         |               |               |              |                   |               | Nullipara   |
|         |           |         |               |               |              |                   |               | Multipara   |
|         |           |         |               |               |              |                   |               | Nullipara   |
|         |           |         |               |               |              |                   |               | Nullipara   |
|         |           |         |               |               |              |                   |               | Multipara   |
|         |           |         |               |               |              |                   |               | Nullipara   |
|         |           |         |               |               |              |                   |               | Nullipara   |
|         |           |         |               |               |              |                   |               | Multipara   |
|         |           |         |               |               |              |                   |               | Nullipara   |
|         |           |         |               |               |              |                   |               | Nullipara   |
|         |           |         |               |               |              |                   |               | Multipara   |
|         |           |         |               |               |              |                   |               | Nullipara   |
|         |           |         |               |               |              |                   |               | Nullipara   |
|         |           |         |               |               |              |                   |               | Multipara   |
|         |           |         |               |               |              |                   |               | Nullipara   |
|         |           |         |               |               |              |                   |               | Nullipara   |
|         |           |         |               |               |              |                   |               | Multipara   |
|         |           |         |               |               |              |                   |               | Nullipara   |
|         |           |         |               |               |              |                   |               | Nullipara   |
|         |           |         |               |               |              |                   |               | Multipara   |
|         |           |         |               |               |              |                   |               | Nullipara   |
|         |           |         |               |               |              |                   |               | Nullipara   |
|         |           |         |               |               |              |                   |               | Multipara   |
|         |           |         |               |               |              |                   |               | Nullipara   |
|         |           |         |               |               |              |                   |               | Nullipara   |
|         |           |         |               |               |              |                   |               | Multipara   |
|         |           |         |               |               |              |                   |               | Nullipara   |
|         |           |         |               |               |              |                   |               | Nullipara   |
|         |           |         |               |               |              |                   |               | Multipara   |
|         |           |         |               |               |              |                   |               | Nullipara   |
|         |           |         |               |               |              |                   |               | Nullipara   |
|         |           |         |               |               |              |                   |               | Multipara   |
|         |           |         |               |               |              |                   |               | Nullipara   |
|         |           |         |               |               |              |                   |               | Nullipara   |
|         |           |         |               |               |              |                   |               | Multipara   |
|         |           |         |               |               |              |                   |               | Nullipara   |
|         |           |         |               |               |              |                   |               | Nullipara   |
|         |           |         |               |               |              |                   |               | Multipara   |
|         |           |         |               |               |              |                   |               | Nullipara   |
|         |           |         |               |               |              |                   |               | Nullipara   |
|         |           |         |               |               |              |                   |               | Multipara   |
|         |           |         |               |               |              |                   |               | Nullipara   |
|         |           |         |               |               |              |                   |               | Nullipara   |
|         |           |         |               |               |              |                   |               | Multipara   |
|         |           |         |               |               |              |                   |               | Nullipara   |
|         |           |         |               |               |              |                   |               | Nullipara   |
|         |           |         |               |               |              |                   |               | Multipara   |
|         |           |         |               |               |              |                   |               | Nullipara   |
|         |           |         |               |               |              |                   |               | Nullipara   |
|         |           |         |               |               |              |                   |               | Multipara   |
|         |           |         |               |               |              |                   |               | Nullipara   |
|         |           |         |               |               |              |                   |               | Nullipara   |
|         |           |         |               |               |              |                   |               | Multipara   |
|         |           |         |               |               |              |                   |               | Nullipara   |
|         |           |         |               |               |              |                   |               | Nullipara   |
|         |           |         |               |               |              |                   |               | Multipara   |
|         |           |         |               |               |              |                   |               | Nullipara   |
|         |           |         |               |               |              |                   |               | Nullipara   |
|         |           |         |               |               |              |                   |               | Multipara   |
|         |           |         |               |               |              |                   |               | Nullipara   |
|         |           |         |               |               |              |                   |               | Nullipara   |
|         |           |         |               |               |              |                   |               | Multipara   |
|         |           |         |               |               |              |                   |               | Nullipara   |
|         |           |         |               |               |              |                   |               | Nullipara   |
|         |           |         |               |               |              |                   |               | Multipara   |
|         |           |         |               |               |              |                   |               | Nullipara   |
|         |           |         |               |               |              |                   |               | Nullipara   |
|         |           |         |               |               |              |                   |               | Multipara   |
|         |           |         |               |               |              |                   |               | Nullipara   |
|         |           |         |               |               |              |                   |               | Nullipara   |
|         |           |         |               |               |              |                   |               | Multipara   |
|         |           |         |               |               |              |                   |               | Nullipara   |
|         |           |         |               |               |              |                   |               | Nullipara   |
|         |           |         |               |               |              |                   |               | Multipara   |
|         |           |         |               |               |              |                   |               | Nullipara   |
|         |           |         |               |               |              |                   |               | Nullipara   |
|         |           |         |               |               |              |                   |               | Multipara   |
|         |           |         |               |               |              |                   |               | Nullipara   |
|         |           |         |               |               |              |                   |               | Nullipara   |
|         |           |         |               |               |              |                   |               | Multipara   |
|         |           |         |               |               |              |                   |               | Nullipara   |
|         |           |         |               |               |              |                   |               | Nullipara   |
|         |           |         |               |               |              |                   |               | Multipara   |
|         |           |         |               |               |              |                   |               | Nullipara   |
|         |           |         |               |               |              |                   |               | Nullipara   |
|         |           |         |               |               |              |                   |               | Multipara   |
|         |           |         |               |               |              |                   |               | Nullipara   |
|         |           |         |               |               |              |                   |               | Nullipara   |
|         |           |         |               |               |              |                   |               | Multipara   |
|         |           |         |               |               |              |                   |               | Nullipara   |
|         |           |         |               |               |              |                   |               | Nullipara   |
|         |           |         |               |               |              |                   |               | Multipara   |
|         |           |         |               |               |              |                   |               | Nullipara   |
|         |           |         |               |               |              |                   |               | Nullipara   |
|         |           |         |               |               |              |                   |               | Multipara   |
|         |           |         |               |               |              |                   |               | Nullipara   |
|         |           |         |               |               |              |                   |               | Nullipara   |
|         |           |         |               |               |              |                   |               | Multipara   |
|         |           |         |               |               |              |                   |               | Nullipara   |
|         |           |         |               |               |              |                   |               | Nullipara   |
|         |           |         |               |               |              |                   |               | Multipara   |
|         |           |         |               |               |              |                   |               | Nullipara   |
|         |           |         |               |               |              |                   |               | Nullipara   |
|         |           |         |               |               |              |                   |               | Multipara   |
|         |           |         |               |               |              |                   |               | Nullipara   |
|         |           |         |               |               |              |                   |               | Nullipara   |
|         |           |         |               |               |              |                   |               | Multipara   |
|         |           |         |               |               |              |                   |               | Nullipara   |
|         |           |         |               |               |              |                   |               | Nullipara   |
|         |           |         |               |               |              |                   |               | Multipara   |
|         |           |         |               |               |              |                   |               | Nullipara   |
|         |           |         |               |               |              |                   |               | Nullipara   |
|         |           |         |               |               |              |                   |               | Multipara   |
|         |           |         |               |               |              |                   |               | Nullipara   |
|         |           |         |               |               |              |                   |               | Nullipara   |
|         |           |         |               |               |              |                   |               | Multipara   |
|         |           |         |               |               |              |                   |               | Nullipara   |
|         |           |         |               |               |              |                   |               | Nullipara   |
|         |           |         |               |               |              |                   |               | Multipara   |
|         |           |         |               |               |              |                   |               | Nullipara   |
|         |           |         |               |               |              |                   |               | Nullipara   |
|         |           |         |               |               |              |                   |               | Multipara   |
|         |           |         |               |               |              |                   |               | Nullipara   |
|         |           |         |               |               |              |                   |               | Nullipara   |
|         |           |         |               |               |              |                   |               | Multipara   |
|         |           |         |               |               |              |                   |               | Nullipara   |
|         |           |         |               |               |              |                   |               | Nullipara   |
|         |           |         |               |               |              |                   |               | Multipara   |
|         |           |         |               |               |              |                   |               | Nullipara   |
|         |           |         |               |               |              |                   |               | Nullipara   |
|         |           |         |               |               |              |                   |               | Multipara   |
|         |           |         |               |               |              |                   |               | Nullipara   |
|         |           |         |               |               |              |                   |               | Nullipara   |
|         |           |         |               |               |              |                   |               | Multipara   |
|         |           |         |               |               |              |                   |               | Nullipara   |
|         |           |         |               |               |              |                   |               | Nullipara   |
|         |           |         |               |               |              |                   |               | Multipara   |
|         |           |         |               |               |              |                   |               | Nullipara   |
|         |           |         |               |               |              |                   |               | Nullipara   |
|         |           |         |               |               |              |                   |               | Multipara   |
|         |           |         |               |               |              |                   |               | Nullipara   |
|         |           |         |               |               |              |                   |               | Nullipara   |
|         |           |         |               |               |              |                   |               | Multipara   |
|         |           |         |               |               |              |                   |               | Nullipara   |
|         |           |         |               |               |              |                   |               | Nullipara   |
|         |           |         |               |               |              |                   |               | Multipara   |
|         |           |         |               |               |              |                   |               | Nullipara   |



|    |           |      |               |   |              |                   |             |
|----|-----------|------|---------------|---|--------------|-------------------|-------------|
|    | 6 Perfect |      | 5 Very easy t |   | 5 Understood | Very useful       | Nullipara   |
|    | 5         | 6    | 5             | 5 | 5            | 6                 | 6 Somewhat  |
| OK | OK        | OK   |               | 6 | 5 Understood | 5                 | Nullipara   |
| OK | 3 OK      |      | 2             | 5 | 5            | 6 Somewhat useful | Nullipara   |
|    |           | 5 OK | Some diffic   |   | 5 Understood | 3                 | Nullipara   |
|    |           |      |               |   |              |                   | Nullipara   |
|    |           |      |               |   |              |                   | Nullipara   |
|    |           |      |               |   |              |                   | Nullipara   |
|    |           |      |               |   |              |                   | Nullipara   |
|    |           |      |               |   |              |                   | Nullipara   |
|    |           |      |               |   |              |                   | Nullipara   |
|    |           |      |               |   |              |                   | Nullipara   |
|    |           |      |               |   |              |                   | Nullipara   |
| OK |           | 5 OK |               | 5 | 5 Understood | 5                 | Nullipara   |
|    | 5 OK      |      | Some diffic   |   | 6 Understood | 5                 | 6 Nullipara |
